# Supplementary material
Source: PubMed Central journal article supplement (PMC3046582)
Supplement: pp.110.168278_1.pdf [file pp.110.168278_1.pdf]

## Supplemental Figures

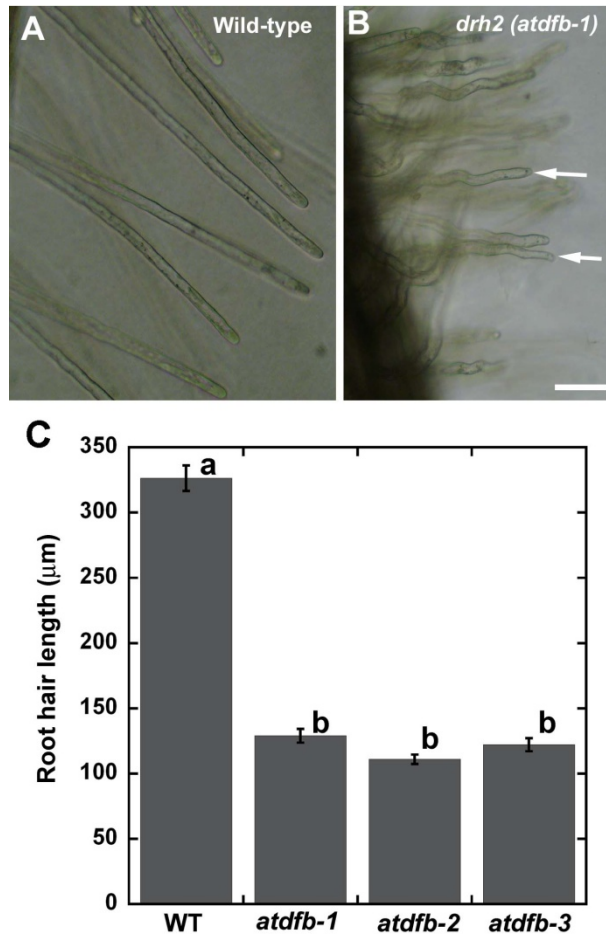

**Supplemental Figure S1.** *drh2 (atdfb-1)* has short and wavy root hairs. Wild type (A) and mutant (B) root hairs from 4 day old seedlings. Note that the mutant has root hairs that are about 3-fold shorter compared to wild-type (arrows). (C) Quantification of root hair length in *atdfb-1*, *atdfb-2*, and *atdfb-3*. Values are means  $\pm$  SE of 100 root hairs from 20 seedlings. Means with different letters are statistically significant (Tukey's test;  $p < 0.05$ ).

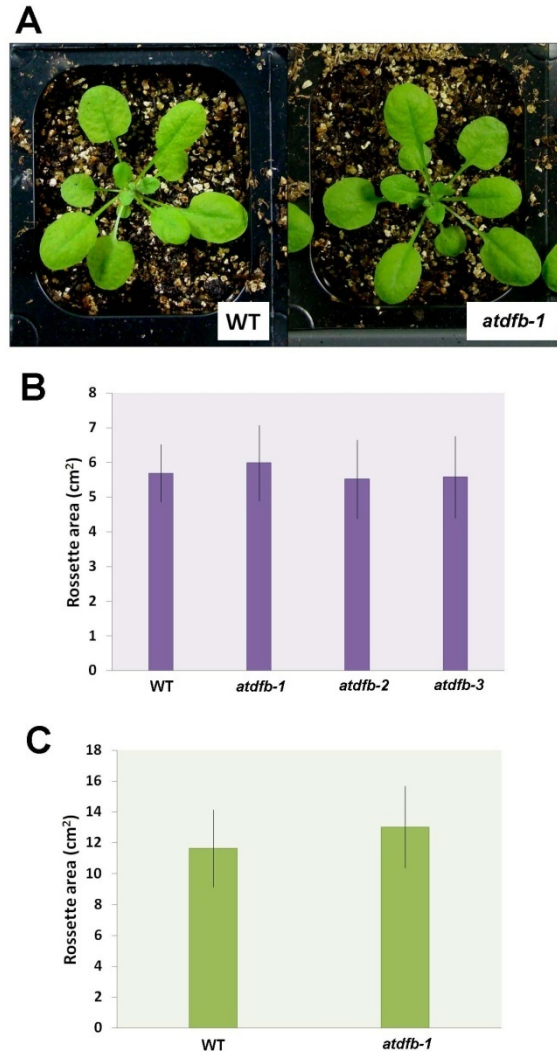

**Supplemental Figure S2.** *AtDFB* knockouts have no obvious defects in shoot development when compared to wild type. A, Representative image of the above ground organs of 17 day old wild type and *atdfb-1* plants from seed directly germinated in soil. Rossette area of 10 day (B) and 17 day (C) old wild type and *atdfb* seedlings. Values are means  $\pm$  SD of 18 plants. Rossette area of *atdfb* showed no significant difference compared to wild type.

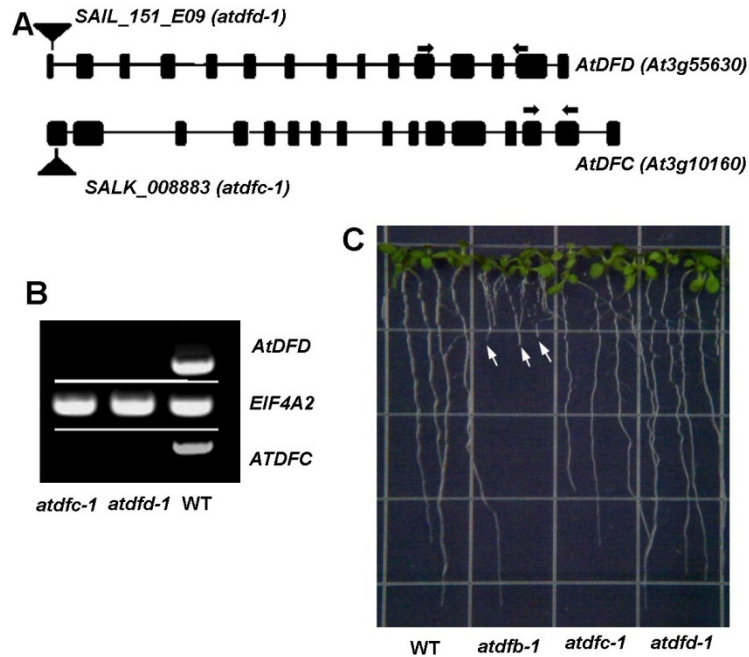

**Supplemental Figure S3.** Identification of mutants to *AtDFC* and *AtDFD*. A, Schematic diagram of the genome organization of *AtDFC* and *AtDFD* showing T-DNA insertion sites for SAIL\_151\_E09 (*atdfd-1*) and SALK\_008883 (*atdfc-1*). B, Semi quantitative RT-PCR of *AtDFC* and *AtDFD* in wild type (WT), *atdfc-1* and *atdfd-1*. C, 12 day old seedlings of wild type (WT), *atdfb-1*, *atdfc-1* and *atdfd-1*. Only *atdfb-1* (arrows) has reduced primary root growth.

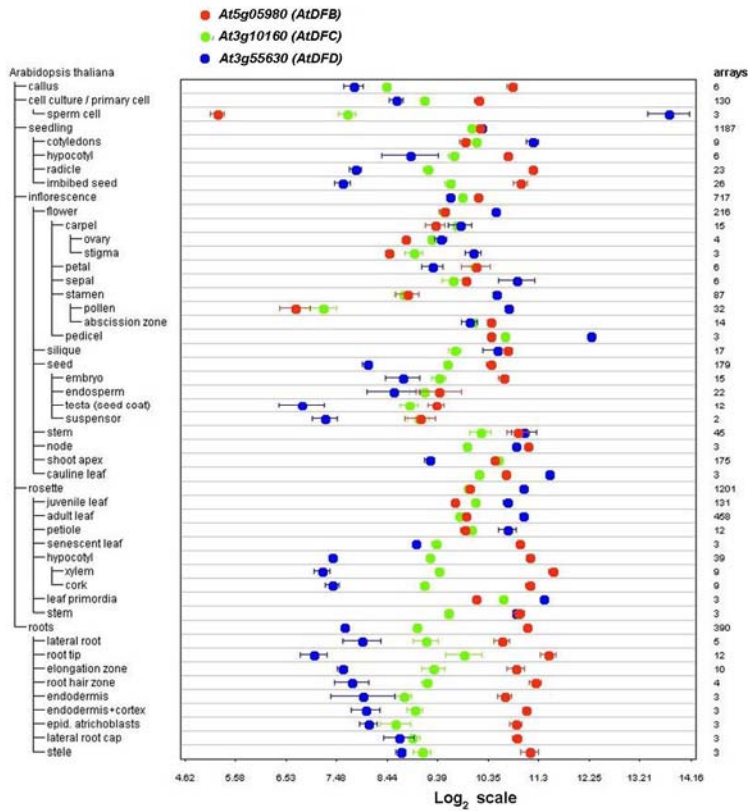

**Supplemental Figure S4.** *AtDFB* is more strongly expressed in roots compared to *AtDFC* and *AtDFD*. *In silico* expression profiling of *AtDFB*, *AtDFC* and *AtDFD* based on publicly available microarray data sets from Genevestigator (Zimmermann et al., 2004). The X axis is in the log<sub>2</sub> scale.

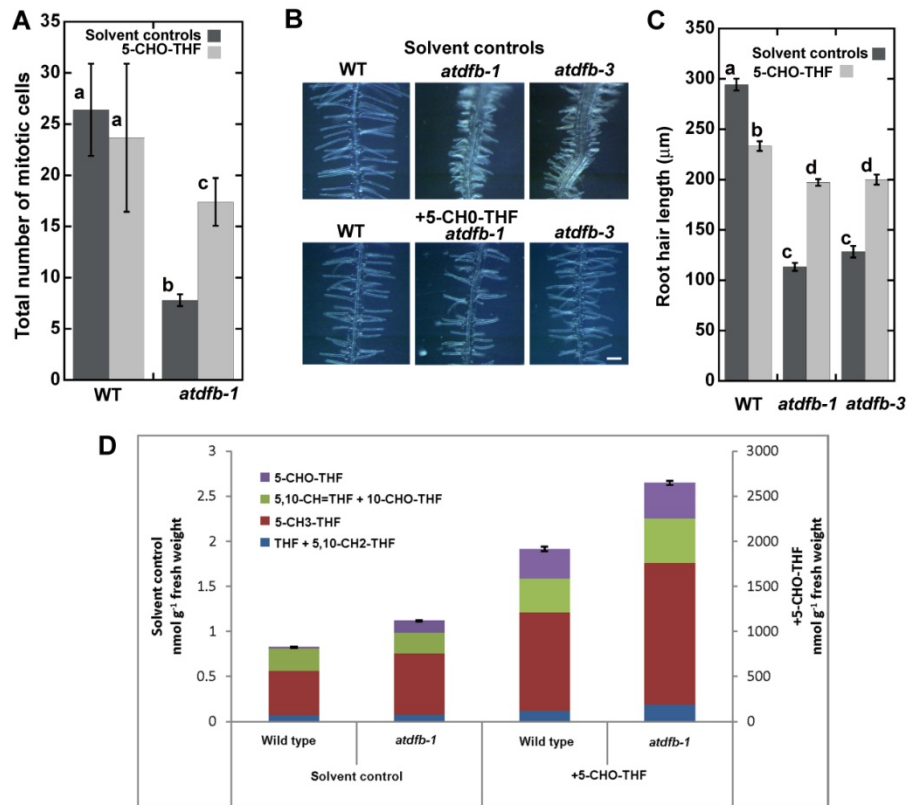

**Supplemental Figure S5.** 5-formyl tetrahydrofolate (5-CHO-THF) rescues the cell division and root hair phenotypes of *atdfb*. A, Number of mitotic cells in the apical 100  $\mu\text{m}$  of *atdfb-1* increases when exposed to exogenous 5-CHO-THF. Data are means of 5 roots  $\pm$  SE. Means with different letters are statistically significant (Tukey's test;  $p < 0.05$ ). Root hair length of *atdfb* is enhanced by 5-CHO-THF (B, C). Data are means from 50 to 80 root hairs  $\pm$  SE from 10-15 independent seedlings. Means with different letters are significantly different (Tukey's test;  $p < 0.05$ ). D, Folate hyper-accumulation in roots of 5-CHO-THF complemented seedlings. Analyses were conducted on roots that were rinsed with distilled water and dried before analysis to avoid 5-CHO-THF transfer from the media. Y-axis values to the left correspond to solvent control data whereas Y-axis values to the right correspond to seedlings treated with 5-CHO-THF. Data are means  $\pm$  SE from three independent replicates. Bar = 100  $\mu\text{m}$  (B).

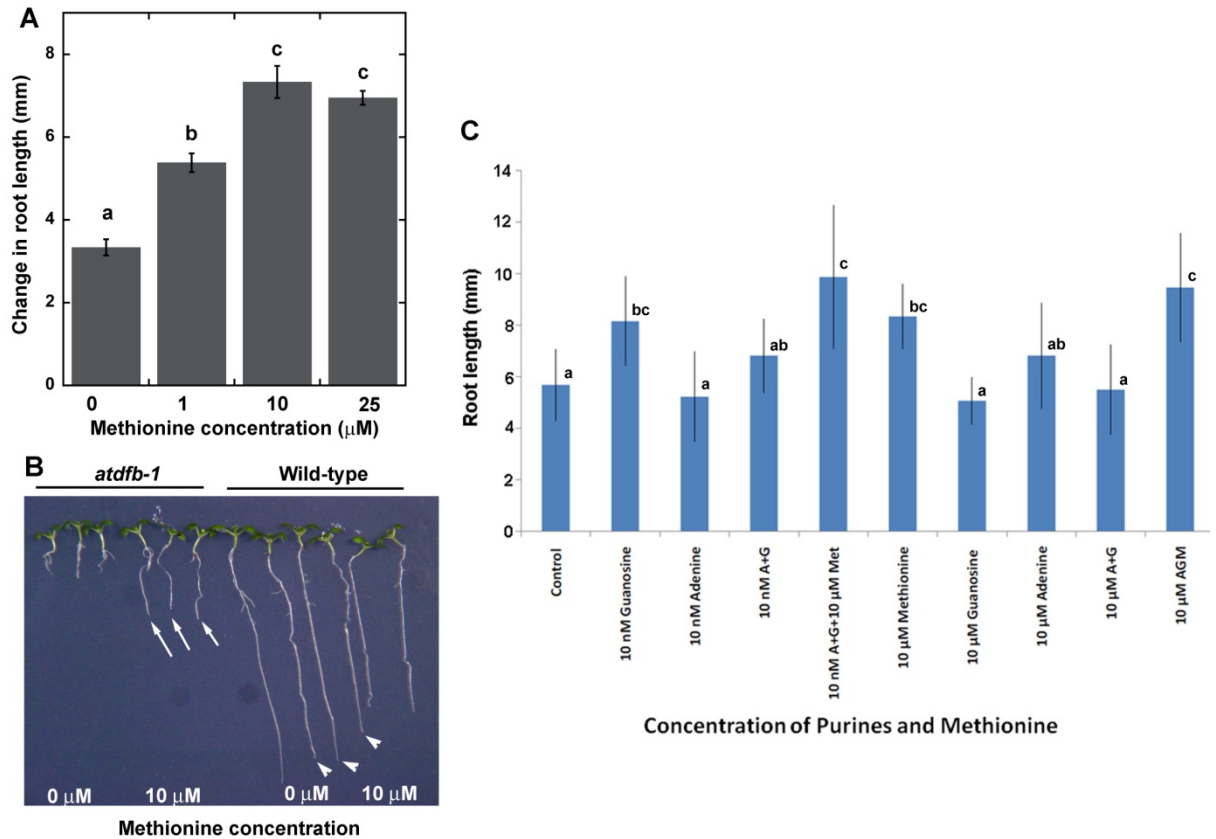

**Supplemental Figure. S6.** Exogenous methionine and guanosine promotes root growth in *atdfb-1* seedlings. A, 10  $\mu\text{M}$  methionine triggered the strongest induction of root growth in *atdfb-1* with a more than 2-fold increase in root length compared to non-treated mutant roots. Means with different letters are statistically significant (Tukey's test;  $p < 0.05$ ). B, Representative images of *atdfb-1* and wild type seedlings with and without exogenous methionine. Although *atdfb-1* roots exposed to methionine were longer than untreated *atdfb-1* roots (arrows), their length was still significantly less than wild type roots (arrowheads). C, Exogenous guanosine (G) but not adenine (A) partially promotes root growth of *atdfb-1*. Data are means from 15 to 25 roots  $\pm$  SE. Means with different letters are statistically significant (Tukey's test;  $p < 0.05$ ).
