# Supplementary material
Source: PubMed Central journal article supplement (PMC3046582)
Supplement: pp.110.168278_2.pdf [file pp.110.168278_2.pdf]

**Table S1.** Total folate content in shoots and roots of 15 d old Arabidopsis seedlings. Values are means  $\pm$  SE from three independent experiments. Values in bold represent statistically significant differences when wild-type and *atdfb-1* were compared (student's t-test  $\alpha=0.05$ ,  $p\leq 0.01$ \*). Values in parenthesis are the percentage of each folate class related to total folate content.

|        | Genotype       | Folate content (pmol g <sup>-1</sup> fresh weight) |                             |                                |                                                |                      |
|--------|----------------|----------------------------------------------------|-----------------------------|--------------------------------|------------------------------------------------|----------------------|
|        |                | THF<br>+<br>5,10-CH <sub>2</sub> -THF              | 5-CH <sub>3</sub> -THF      | 5,10-CH=THF<br>+<br>10-CHO-THF | 5-CHO-THF                                      | Total Folates        |
| Shoots | Wild-type      | <b>115.03 <math>\pm</math> 12.18</b><br>(10)       | 370.28 $\pm$ 34.46<br>(32)  | 388.52 $\pm$ 85.42<br>(33)     | <b>287.74 <math>\pm</math> 13.99</b><br>(25)   | 1161.57 $\pm$ 87.43  |
|        | <i>atdfb-1</i> | <b>342.76 <math>\pm</math> 60.42 *</b><br>(29)     | 487.30 $\pm$ 24.60<br>(41)  | 135.54 $\pm$ 44.24<br>(11)     | <b>218.24 <math>\pm</math> 18.86 *</b><br>(18) | 1183.84 $\pm$ 16.54  |
| Roots  | Wild-type      | 208.00 $\pm$ 50.40<br>(21)                         | 497.45 $\pm$ 18.81<br>(50)  | 267.02 $\pm$ 26.62<br>(27)     | <b>22.07 <math>\pm</math> 11.30</b><br>(2)     | 994.54 $\pm$ 94.55   |
|        | <i>atdfb-1</i> | 159.00 $\pm$ 8.19<br>(12)                          | 814.71 $\pm$ 130.41<br>(60) | 233.20 $\pm$ 6.47<br>(17)      | <b>160.72 <math>\pm</math> 32.14*</b><br>(12)  | 1367.63 $\pm$ 153.64 |
