# Supplementary material
Source: PubMed Central journal article supplement (PMC3046582)
Supplement: pp.110.168278_3.pdf [file pp.110.168278_3.pdf]

**Table S4.** Primer sequences used for genotyping and gene expression analysis.

| Genes         | Sense (5'-3')/ Left Primer                                  | Antisense (5'-3')/Right Primer | Usage          |
|---------------|-------------------------------------------------------------|--------------------------------|----------------|
| <i>AGL42</i>  | GCTCTGATATGCAGAAGACGATC                                     | CAATTGAGCCTTTCTTTCTCG          | Real Time      |
| <i>EIF4A2</i> | GGCTGAATGAAGTTCTCGATGGACAG                                  | ACGAGAGCCTGGCACTGGAGAAG        | Real Time      |
| <i>AtDFB</i>  | GGAAAGATTTTCGTTTGGATGG                                      | TGACATACAATTGAACAACAATATC      | Real Time      |
| SALK_015472   | GGCTTTTCTGAACTGGACTCTTC (LP)                                | TTAAGGATTTGGGTTCCGATC (RP)     | Genotyping     |
| SAIL_556_G08  | CTGACCACTTAACAGCCTTGC (LP)                                  | ATTGGAGGTTGGATTAGGTGG (RP)     | Genotyping     |
| <i>AtDFC</i>  | GGGGCTTGACCATACTGA                                          | CTGCAGGTCCACCACATTG            | Real Time      |
| SALK008883    | CGATGGTTCTCTTCTGCAGTC (LP)                                  | GGAGGGTTCTCACTTCTCATG (RP)     | Genotyping     |
| SAIL510E12    | GGCCCAAGTTGTTTGTATCATC (LP)                                 | TTCAAGCTTGTCACGATTTC (RP)      | Genotyping     |
| <i>AtDFD</i>  | GCAAAGAAGAAGAGAAGAGTTTCG                                    | GAAAACGAACTGTTTACTTTGGC        | Real Time      |
| SAIL151E09    | CTCTTTCTGCGGTTCAAGACAC (LP)                                 | TGATCCCTTCAAACGATCAC (RP)      | Genotyping     |
| <i>AtDFB</i>  | <i>In situ</i> Probes (Sense/Antisense)                     |                                |                |
|               | CCTCATATGAATCACCTCCTTGAGCTGCCATGTCGATCTGCTTTCTTAACGAATGAAT  |                                | <i>In situ</i> |
|               | ATTCATTTCGTTAAGAAAGCAGATCGACATGGCAGCTCAAGGAGGTGATTCATATGAGG |                                | <i>In situ</i> |
